# Supplementary material
Source: PubMed Central journal article supplement (PMC7783753)
Supplement: ajcr0010-4547-f3.pdf [file ajcr0010-4547-f3.pdf]

## Predictors of nivolumab response and survival in unresectable HCC

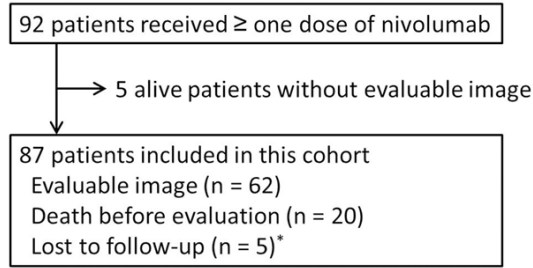

**Supplementary Figure 1.** Flow chart of patients enrolled in this study. \* Five patients were lost to follow-up for more than 3 months.

**Supplementary Table 1.** Demographics of patients with evaluable radiological imaging data or death before evaluation

| Character (N = 82)                   | Evaluable imaging (N = 62)   | Death before evaluation (N = 20) | P value |
|--------------------------------------|------------------------------|----------------------------------|---------|
| Age (years)                          | 62.1 (54.8-67.6)             | 66.8 (58.9-69.9)                 | .214    |
| Sex, M/F (% male)                    | 56 (90.3)                    | 19 (95.0)                        | .518    |
| Body mass index (kg/m <sup>2</sup> ) | 24.80 (21.89-27.05)          | 20.83 (19.72-22.85)              | <.001   |
| NLR                                  | 4.76 (2.98-8.34)             | 9.96 (5.68-15.40)                | .002    |
| Platelet count (10 <sup>9</sup> /L)  | 141 (91-198)                 | 175 (150-265)                    | .039    |
| AST (U/L)                            | 60 (41-100)                  | 147 (96-274)                     | <.001   |
| ALT (U/L)                            | 50 (28-62)                   | 61 (33-129)                      | .042    |
| Total bilirubin (mg/dL)              | 1.1 (0.7-1.7)                | 1.9 (1.2-12.2)                   | .003    |
| Albumin (g/dL)                       | 3.7 (3.2-4.0)                | 3.0 (2.5-3.5)                    | .002    |
| INR                                  | 1.09 (1.04-1.20)             | 1.24 (1.14-1.58)                 | <.001   |
| <b>Etiology</b>                      |                              |                                  |         |
| Alcohol                              | 16 (25.8)                    | 7 (35.0)                         | .429    |
| HBV                                  | 40 (64.5)                    | 8 (40.0)                         | .054    |
| HCV                                  | 14 (22.6)                    | 6 (30.0)                         | .504    |
| Diabetes mellitus                    | 18 (29.0)                    | 6 (30.0)                         | .934    |
| Liver cirrhosis                      | 45 (72.6)                    | 17 (85.0)                        | .264    |
| Child-Pugh score                     | 6 (5-7)                      | 8 (6-11)                         | <.001   |
| Class A                              | 37 (59.7)                    | 5 (25.0)                         |         |
| Class B                              | 20 (32.3)                    | 9 (45.0)                         |         |
| Class C                              | 3 (4.8)                      | 6 (30.0)                         |         |
| ALBI grade 1/2/3                     | 15 (25.4)/37 (62.7)/7 (11.9) | 3 (15.0)/9 (45.0)/8 (40.0)       | .023    |
| AFP (ng/mL)                          | 337.6 (11.8-6963.0)          | 1651.9 (41.8-36835.5)            | .261    |
| AFP ≥400 ng/mL                       | 28 (45.2)                    | 10 (50.0)                        | .474    |
| <b>BCLC stage</b>                    |                              |                                  |         |
| A                                    | 6 (9.7)                      | 0 (0)                            | <.001   |
| B                                    | 8 (12.9)                     | 0 (0)                            |         |
| C                                    | 45 (72.6)                    | 13 (65.0)                        |         |
| D                                    | 3 (4.8)                      | 7 (35.0)                         |         |
| CLIP score                           | 2 (1-4)                      | 4 (3-5)                          | <.001   |
| Max. tumor size (cm)                 | 4.6 (2.7-7.8)                | 7.3 (5.1-10.3)                   | .017    |
| <b>Tumor number</b>                  |                              |                                  |         |
| 1                                    | 16 (25.8)                    | 2 (10.0)                         | .141    |
| 2                                    | 6 (9.7)                      | 2 (10.0)                         |         |
| 3                                    | 7 (11.3)                     | 2 (10.0)                         |         |
| ≥4                                   | 33 (53.2)                    | 14 (70.0)                        |         |

## Predictors of nivolumab response and survival in unresectable HCC

|                                       |                      |                       |       |
|---------------------------------------|----------------------|-----------------------|-------|
| Total tumor volume (cm <sup>3</sup> ) | 667.2 (185.8-2675.2) | 2794.8 (703.6-5886.8) | .011  |
| MVI                                   | 34 (54.8)            | 15 (75.0)             | .112  |
| VP3                                   | 12 (19.4)            | 5 (25.0)              |       |
| VP4                                   | 20 (32.3)            | 10 (50.0)             |       |
| Hepatic vein                          | 2 (3.2)              | 0 (0)                 |       |
| EHM                                   | 34 (54.8)            | 16 (80.0)             | .046  |
| Prior therapy                         |                      |                       | .011  |
| Sorafenib                             | 33 (53.2)            | 6 (30.0)              |       |
| Lenvatinib                            | 7 (11.3)             | 0 (0)                 |       |
| Surgery                               | 14 (22.6)            | 2 (10.0)              |       |
| TACE/TARE                             | 41 (66.1)/2 (3.2)    | 5 (25.0)/0 (0)        |       |
| RFA                                   | 13 (21.0)            | 0 (0)                 |       |
| PEI                                   | 4 (6.5)              | 0 (0)                 |       |
| RT                                    | 41 (66.1)            | 7 (35.0)              |       |
| Nivolumab dose                        | 6 (5-10)             | 2 (1-3)               | <.001 |
| Treatment duration                    | 3.62 (2.39-6.03)     | 0.70 (0.30-1.03)      | <.001 |
| Concurrent therapy                    | 46 (74.2)            | 7 (35.0)              | .002  |
| Sorafenib                             | 20 (32.3)*           | 3 (15.0)              |       |
| Regorafenib                           | 4 (6.5)*             | 3 (15.0)              |       |
| Lenvatinib                            | 15 (24.2)*           | 1 (5.0)               |       |
| Chemotherapy                          | 7 (11.3)             | 0 (0)                 |       |
| Radiotherapy                          | 11 (17.7)            | 1 (5.0)               |       |
| TACE                                  | 11 (17.7)            | 0 (0)                 |       |
| irAEs                                 | 9 (14.5)             | 2 (10.0)              | .609  |
| Progression-free survival (months)    | 4.43 (2.33-8.70)     | 1.13 (0.43-1.93)      | <.001 |
| Overall survival (months)             | 8.70 (4.53-20.60)    | 1.27 (0.47-1.93)      | <.001 |

Data are presented as the median (first quartile-third quartile). AFP,  $\alpha$ -fetoprotein; ALT, alanine aminotransferase; AST, aspartate aminotransferase; BCLC, Barcelona Clinic Liver Cancer; EHM, extrahepatic metastasis; F, female; CLIP, Cancer of the Liver Italian Program; HBV, hepatitis B virus; HCV, hepatitis C virus; irAEs, immune-related adverse events; IQR, interquartile range; M, male; MVI, macrovascular invasion; RT, radiotherapy; NLR, neutrophil-lymphocyte ratio; TACE, transarterial chemoembolization; TARE, transarterial radioembolization; TKI, tyrosine kinase inhibitor; PEI, percutaneous ethanol injection; INR, international normalized ratio; RFA, radiofrequency ablation. \*Seven patients received sequential TKI therapy: sorafenib→regorafenib (3), sorafenib→lenvatinib (3), and sorafenib→lenvatinib→regorafenib (1).

**Supplementary Table 2.** IrAEs in 87 patients with hepatocellular carcinoma

| Type of irAE (N = 40) | irAE, N (%) |                |
|-----------------------|-------------|----------------|
|                       | Any grade   | Grade $\geq 3$ |
| Hepatitis             | 14 (16.1)   | 5 (5.7)        |
| Fatigue               | 12 (13.8)   | 2 (2.3)        |
| Dermatitis            | 11 (12.6)   | 3 (3.4)        |
| Colitis               | 9 (10.3)    | 1 (1.1)        |
| Hand foot syndrome    | 4 (4.6)     | 0 (0)          |
| Fever                 | 4 (4.6)     | 0 (0)          |
| Pneumonitis           | 2 (2.3)     | 2 (2.3)        |
| Gastric necrosis      | 1 (1.1)     | 1 (1.1)        |
| Myalgia               | 1 (1.1)     | 0 (0)          |
| Dizziness             | 1 (1.1)     | 0 (0)          |

irAE, immune-related adverse event.

## Predictors of nivolumab response and survival in unresectable HCC

**Supplementary Table 3.** List of patients with  $\geq$  grade 3 irAEs

| Age (years) | Sex | Nivolumab  |                        | Time of irAE (after nivolumab initiation, months) | Type of irAE     | Best response | Final status <sup>a</sup> | COD           |
|-------------|-----|------------|------------------------|---------------------------------------------------|------------------|---------------|---------------------------|---------------|
|             |     | Total dose | Average dosage (mg/kg) |                                                   |                  |               |                           |               |
| 67.6        | M   | 1          | 2.80                   | 0.40                                              | Gastric necrosis | DBE           | E                         | Infection     |
| 65.4        | M   | 6          | 2.96                   | 4.17                                              | Hepatitis        | PR            | S                         |               |
| 56.6        | M   | 6          | 3.11                   | 3.27                                              | Hepatitis        | CR            | E                         | irAE          |
| 78.1        | F   | 5          | 3.19                   | 2.70                                              | Colitis          | LFU           | C                         |               |
| 64.2        | M   | 6          | 4.02                   | 3.63                                              | Dermatitis       | PR            | C                         |               |
| 58.2        | M   | 4          | 1.56                   | 2.17                                              | Fatigue          | LFU           | C                         |               |
| 67.5        | M   | 13         | 2.37                   | 5.00                                              | Pneumonitis      | CR            | E                         | Liver failure |
| 78.5        | M   | 10         | 3.53                   | 5.00                                              | Hepatitis        | PR            | E                         | Liver failure |
| 76.4        | M   | 2          | 2.67                   | 2.30                                              | Fatigue          | LFU           | C                         |               |
| 61.7        | M   | 6          | 1.57                   | 2.00                                              | Dermatitis       | PD            | S                         |               |
| 56.4        | F   | 15         | 3.30                   | 8.00                                              | Dermatitis       | CR            | E                         | Liver failure |
| 51.0        | M   | 6          | 2.94                   | 5.00                                              | Pneumonitis      | PD            | E                         | ICH           |
| 67.0        | M   | 10         | 3.06                   | 5.13                                              | Hepatitis        | PR            | E                         | irAE          |
| 36.9        | M   | 2          | 2.96                   | 0.93                                              | Hepatitis        | DBE           | E                         | irAE          |

C, censored (lost to follow-up before Dec 31, 2019); COD, cause of death; CR, complete response; DBE, death before evaluation; E, expired; F, female; ICH, intracranial hemorrhage; irAE, immune-related adverse event; LFU, lost to follow-up; M, male; PD, progressive disease; PR, partial response; S, survival. <sup>a</sup>Final status as of Dec 31, 2019.

**Supplementary Table 4.** Factors associated with irAEs (grade  $\geq$ 3) in 87 patients with HCC

| Character              |                         | Univariate analysis  |         | Multivariate analysis |         |
|------------------------|-------------------------|----------------------|---------|-----------------------|---------|
|                        |                         | OR (95% CI)          | P value | OR (95% CI)           | P value |
| Age (year)             |                         | 1.012 (0.960-1.067)  | .651    |                       |         |
| Sex                    | Female vs male          | 1.861 (0.335-10.333) | .478    |                       |         |
| Alcohol                | No vs yes               | 0.880 (0.247-3.138)  | .843    |                       |         |
| HBV                    | No vs yes               | 0.513 (0.147-1.786)  | .294    |                       |         |
| HCV                    | No vs yes               | 1.290 (0.325-5.126)  | .717    |                       |         |
| TTV (cm <sup>3</sup> ) | $\leq$ 1000 vs $>$ 1000 | 2.065 (0.631-6.760)  | .231    |                       |         |
| Tumor number           | Single vs multiple      | 2.148 (0.627-7.636)  | .224    |                       |         |
| MVI                    | No vs yes               | 1.517 (0.481-4.781)  | .477    |                       |         |
| EHM                    | No vs yes               | 1.607 (0.509-5.070)  | .418    |                       |         |
| CLIP score             | 0-2 vs $\geq$ 3         | 3.981 (1.025-15.459) | .046    |                       |         |
| AFP (ng/mL)            | $<$ 400 vs $\geq$ 400   | 1.189 (0.374-3.785)  | .769    |                       |         |
| NLR                    | $\leq$ 3.0 vs $>$ 3.0   | 1.238 (0.302-5.074)  | .767    |                       |         |
| AST (U/L)              | $\leq$ 40 vs $>$ 40     | 0.333 (0.040-2.784)  | .310    |                       |         |
| ALT (U/L)              | $\leq$ 40 vs $>$ 40     | 0.607 (0.174-2.120)  | .434    |                       |         |
| Child-Pugh class       | A vs B/C                | 3.524 (0.895-13.874) | .072    |                       |         |
| ALBI grade             | 1 vs 2/3                | 0.935 (0.230-3.797)  | .925    |                       |         |
| Prior therapy          |                         |                      |         |                       |         |
| Sorafenib              | No vs yes               | 1.370 (0.432-4.344)  | .592    |                       |         |
| Lenvatinib             | No vs yes               | 0.441 (0.077-2.541)  | .360    |                       |         |
| Concurrent therapy     | No vs yes               | 0.681 (0.195-2.386)  | .549    |                       |         |
| TKI                    | No vs yes               | 0.434 (0.132-1.421)  | .168    |                       |         |
| TACE                   | No vs yes               | 0.451 (0.103-1.968)  | .290    |                       |         |
| Radiotherapy           | No vs yes               | 1.556 (0.230-10.534) | .651    |                       |         |
| AFP response           | Yes vs no               | 1.500 (0.455-4.946)  | .505    |                       |         |

## Predictors of nivolumab response and survival in unresectable HCC

Best response CR + PR vs none 4.227 (1.226-14.573) .022

AFP,  $\alpha$ -fetoprotein; ALBI, albumin-bilirubin; ALT, alanine aminotransferase; AST, aspartate aminotransferase; CLIP, Cancer of the Liver Italian Program; CR + PR, complete response plus partial response; EHM, extrahepatic metastasis; HBV, hepatitis B virus; HCV, hepatitis C virus; irAEs, immune-related adverse events; MVI, macroscopic vascular invasion; NLR, neutrophil-lymphocyte ratio; TACE, transarterial chemoembolization; TKI, tyrosine kinase inhibitor; TTV, total tumor volume.

**Supplementary Table 5.** Factors associated with objective response in 62 patients with HCC who underwent radiological assessment

| Character              | Univariate analysis     |                       | Multivariate analysis |                      |
|------------------------|-------------------------|-----------------------|-----------------------|----------------------|
|                        | OR (95% CI)             | P value               | OR (95% CI)           | P value              |
| Age (year)             | 1.038 (0.982-1.097)     | .192                  |                       |                      |
| Sex                    | Female vs male          | 1.367 (0.226-8.247)   | .733                  |                      |
| Alcohol                | No vs yes               | 0.776 (0.224-2.697)   | .690                  |                      |
| HBV                    | No vs yes               | 0.686 (0.206-2.290)   | .540                  |                      |
| HCV                    | No vs yes               | 1.510 (0.365-6.248)   | .570                  |                      |
| Any irAEs              | Yes vs no               | 2.095 (0.661-6.646)   | .209                  |                      |
| Grade 1-2 irAEs        | Yes vs no               | 0.625 (0.188-2.079)   | .443                  |                      |
| Grade $\geq 3$ irAEs   | Yes vs no               | 7.636 (1.643-35.503)  | .010                  |                      |
| TTV (cm <sup>3</sup> ) | $\leq 1000$ vs $> 1000$ | 4.879 (1.231-19.337)  | .024                  |                      |
| Tumor number           | Single vs multiple      | 9.286 (2.549-33.832)  | .001                  | 9.542 (1.537-59.255) |
| MVI                    | No vs yes               | 6.500 (1.806-23.393)  | .004                  |                      |
| EHM                    | No vs yes               | 2.143 (0.689-6.668)   | .188                  |                      |
| CLIP score             | 0-2 vs $\geq 3$         | 6.000 (1.226-29.371)  | .027                  |                      |
| AFP (ng/mL)            | $< 400$ vs $\geq 400$   | 0.9338 (0.305-2.879)  | .910                  |                      |
| NLR                    | $\leq 3.0$ vs $> 3.0$   | 6.107 (1.754-21.268)  | .004                  |                      |
| AST (U/L)              | $\leq 40$ vs $> 40$     | 3.000 (0.820-10.978)  | .097                  |                      |
| ALT (U/L)              | $\leq 40$ vs $> 40$     | 1.611 (0.520-4.993)   | .409                  |                      |
| Child-Pugh class       | A vs B/C                | 4.058 (1.017-16.186)  | .047                  |                      |
| ALBI grade             | 1 vs 2/3                | 6.750 (1.865-24.425)  | .004                  |                      |
| Prior therapy          |                         |                       |                       |                      |
| Sorafenib              | No vs yes               | 2.750 (0.862-8.771)   | .087                  |                      |
| Lenvatinib             | No vs yes               | 2.2462 (0.274-22.116) | .421                  |                      |
| Concurrent therapy     | No vs yes               | 0.846 (0.230-3.108)   | .801                  |                      |
| TKI                    | No vs yes               | 0.670 (0.217-2.071)   | .486                  |                      |
| TACE                   | No vs yes               | 0.369 (0.096-1.427)   | .149                  |                      |
| Radiotherapy           | No vs yes               | 2.333 (0.393-13.845)  | .351                  |                      |
| AFP response           | Yes vs no               | 3.808 (1.153-12.575)  | .028                  | 5.997 (1.070-33.600) |

AFP,  $\alpha$ -fetoprotein; ALBI, albumin-bilirubin; ALT, alanine aminotransferase; AST, aspartate aminotransferase; CLIP, Cancer of the Liver Italian Program; EHM, extrahepatic metastasis; HBV, hepatitis B virus; HCV, hepatitis C virus; MVI, macroscopic vascular invasion; NLR, neutrophil-lymphocyte ratio; TACE, transarterial chemoembolization; TKI, tyrosine kinase inhibitor; TTV, total tumor volume.

## Predictors of nivolumab response and survival in unresectable HCC

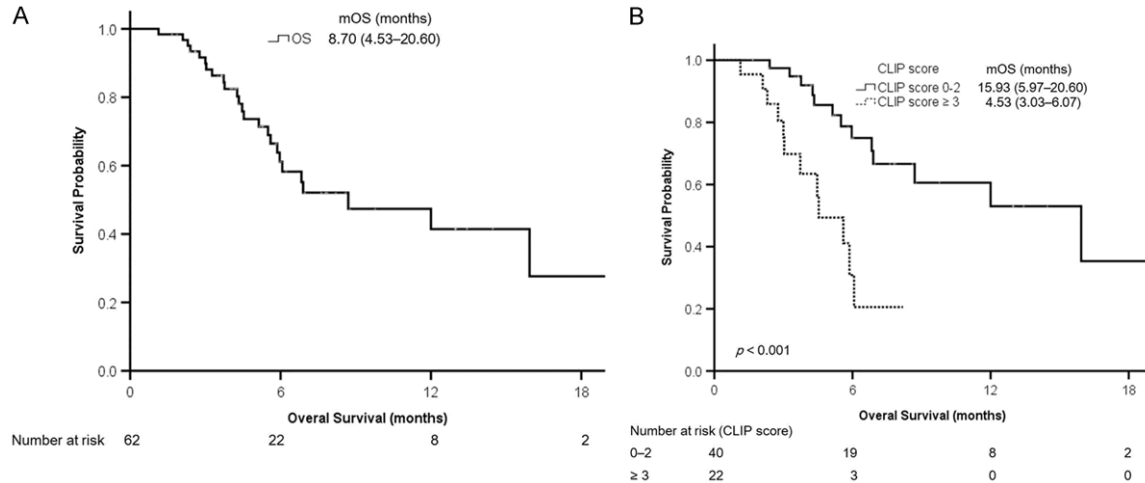

**Supplementary Figure 2.** Kaplan-Meier analyses of the overall survival in patients evaluable through radiological imaging. A. All patients. B. Patients with higher ( $\geq 3$ ) or lower (0-2) CLIP score. Continuous variables are presented as the median (first quartile-third quartile). CLIP, Cancer of the Liver Italian Program; mOS, median overall survival.

**Supplementary Table 6.** Comparison between the present study and other studies

| Status                           | This study         | Finkelmeier <i>et al.</i><br>[13] <sup>a</sup> | Scheiner <i>et al.</i><br>[14] <sup>b</sup> | Shao <i>et al.</i><br>[18] <sup>c</sup> | Lee <i>et al.</i><br>[15] <sup>d</sup> |
|----------------------------------|--------------------|------------------------------------------------|---------------------------------------------|-----------------------------------------|----------------------------------------|
| Number of patients               | 87                 | 34                                             | 65                                          | 43                                      | 95                                     |
| Age                              | 63.4 (55.4-68.6)   | 65 (range 40-77)                               | 65.2 $\pm$ 11.1                             | 55 $\pm$ 11.9                           | 65.5 (57.2-72.9)                       |
| Sex (male), <i>n</i> (%)         | 79 (90.8)          | 26 (76.5)                                      | 49 (75.4)                                   | 35 (81.4)                               | 73 (76.8)                              |
| Child-Pugh class A/B/C (%)       | 51.7/34.5/11.5     | 55.9/41.2/2.9                                  | 49.2/43.1/7.7                               | 100/0/0                                 | 72.6/24.2/3.2                          |
| AFP $\geq 400$ ng/mL             | 39 (44.8)          | N/A                                            | 28 (43.1)                                   | 23 (53.5)                               | 53 (55.8)                              |
| BCLC stage A/B/C/D (%)           | 8.0/10.3/69.0/12.6 | 11.8/38.2/50/0                                 | 0/12.3/78.5/9.2                             | 0/7.0/93.0/0                            | 0/21.1/78.9/0                          |
| CLIP 0-2/ $\geq 3$ (%)           | 52.9/47.1          | N/A                                            | N/A                                         | 79.1/20.9                               | N/A                                    |
| Max. tumor size (cm)             | 5.2 (2.7-8.3)      | N/A                                            | N/A                                         | N/A                                     | 5.2 (2.3-8.8)                          |
| Multiple tumors, <i>n</i> (%)    | 67 (77.0)          | N/A                                            | N/A                                         | N/A                                     | 89 (93.7)                              |
| MVI, <i>n</i> (%)                | 51 (58.6)          | 19 (55.9)                                      | 24 (36.9)                                   | 17 (39.5)                               | 51 (53.7)                              |
| EHM, <i>n</i> (%)                | 52 (59.8)          | 19 (55.9)                                      | 35 (53.8)                                   | 38 (88.4)                               | 48 (50.5)                              |
| <b>Prior treatment</b>           |                    |                                                |                                             |                                         |                                        |
| Sorafenib, <i>n</i> (%)          | 40 (46.0)          | 25 (73.5)                                      | 56 (86.2)                                   | N/A                                     | 56 (58.9)                              |
| Lenvatinib, <i>n</i> (%)         | 7 (8.0)            | N/A                                            | N/A                                         | N/A                                     | N/A                                    |
| TACE, <i>n</i> (%)               | 49 (56.3)          | 15 (44.1)                                      | 30 (46.2)                                   |                                         | 55 (57.9)                              |
| RT, <i>n</i> (%)                 | 44 (50.6)          |                                                |                                             |                                         | 23 (24.2)                              |
| Surgery, <i>n</i> (%)            | 16 (18.4)          | 9 (26.5)                                       | 15 (23.1)                                   |                                         | 35 (36.8)                              |
| RFA, <i>n</i> (%)                | 15 (17.2)          |                                                | 9 (13.8)                                    |                                         | 31 (32.6)                              |
| Objective response, <i>n</i> (%) | 17 (19.5)          | 4 (11.8)                                       | 8 (12.3)                                    | 15 (34.9)                               | 22 (24.4)                              |
| Disease control, <i>n</i> (%)    | 34 (39.1)          | 12 (35.3)                                      | 32 (49.2)                                   | 25 (58.1)                               | 33 (36.7)                              |

AFP,  $\alpha$ -fetoprotein; BCLC, Barcelona Clinic Liver Cancer; CLIP, Cancer of the Liver Italian Program; EHM, extrahepatic metastasis; MVI, macrovascular invasion; N/A, not applicable; RT, radiotherapy; TACE, transarterial chemoembolization; RFA, radiofrequency ablation. <sup>a</sup>All patients received nivolumab therapy. <sup>b</sup>A total of 34 patients received nivolumab, and 34 patients received pembrolizumab therapy. <sup>c</sup>Enrolled patients from several clinical trials conducted in one hospital. In total, 27 patients received program cell death-1 (PD1) blockade, 1 patient received anticytotoxic T-lymphocyte antigen 4 (CTLA4), and 15 patients received PD1 blockade plus anti-CTLA4 therapy. <sup>d</sup>A total of 92 patients received nivolumab, and 3 patients received pembrolizumab therapy.
